# Supplementary material for: Identifying an optimal dihydroartemisinin-piperaquine dosing regimen for malaria prevention in young Ugandan children
Source: PubMed Central journal article supplement (PMC8602248; doi:10.1038/s41467-021-27051-8), 2021-11-18
Supplement: 41467_2021_27051_MOESM1_ESM.pdf [file 41467_2021_27051_MOESM1_ESM.pdf]

- 1 **Identifying an optimal dihydroartemisinin-piperaquine dosing regimen for malaria**
- 2 **prevention in young Ugandan children**
- 3 **Supplemental Tables**
- 4 **Supplementary Table 1. Simulated DP dosing regimens**

| <b>DP Regimen</b>                                     | <b>Dosing bands</b>                                                                                                                                                                                                |
|-------------------------------------------------------|--------------------------------------------------------------------------------------------------------------------------------------------------------------------------------------------------------------------|
| Protocol regimen based on manufacturer package insert | <p>&lt;6 kg: DHA/PPQ 10/80 mg daily x 3 days</p> <p>6-&lt;11 kg: DHA/PPQ 20/160 mg daily x 3 days</p> <p>11-&lt;15 kg: DHA/PPQ 30/240 mg daily x 3 days</p> <p>15-&lt;20 kg: DHA/PPQ 40/320 mg daily x 3 days</p>  |
| WHO 2015 regimen                                      | <p>&lt;8 kg: DHA/PPQ 20/160 mg daily x 3 days</p> <p>8-&lt;11 kg: DHA/PPQ 30/240 mg daily x 3 days</p> <p>11-&lt;17 kg: DHA/PPQ 40/320 mg daily x 3 days</p> <p>17-&lt;25 kg: DHA/PPQ 50/480 mg daily x 3 days</p> |
| Age-based 6 & 18 months                               | <p>2-&lt;6 months of age: DHA/PPQ 20/160 mg daily x 3 days</p> <p>6-&lt;18 months of age: DHA/PPQ 30/240 mg daily x 3 days</p> <p>18-24 months of age: DHA/PPQ 40/320 mg daily x 3 days</p>                        |

6 **Supplementary Table 2. PK-QTc model parameters**

| <b>Parameter</b>                          | <b>Value (% RSE)</b> | <b>Interindividual</b>     |
|-------------------------------------------|----------------------|----------------------------|
|                                           |                      | <b>Variability (% RSE)</b> |
| N (subjects)                              |                      | 32                         |
| Pre-drug QTcB (msec)                      | 410 (0.5)            | 1.4% (41)                  |
| $\Theta_{\text{slope}}/1000$ (msec/ng/mL) | .0463 (45)           | -                          |

7

8

9

10

11

12

13

14

15

16 **Supplemental Figures**

17

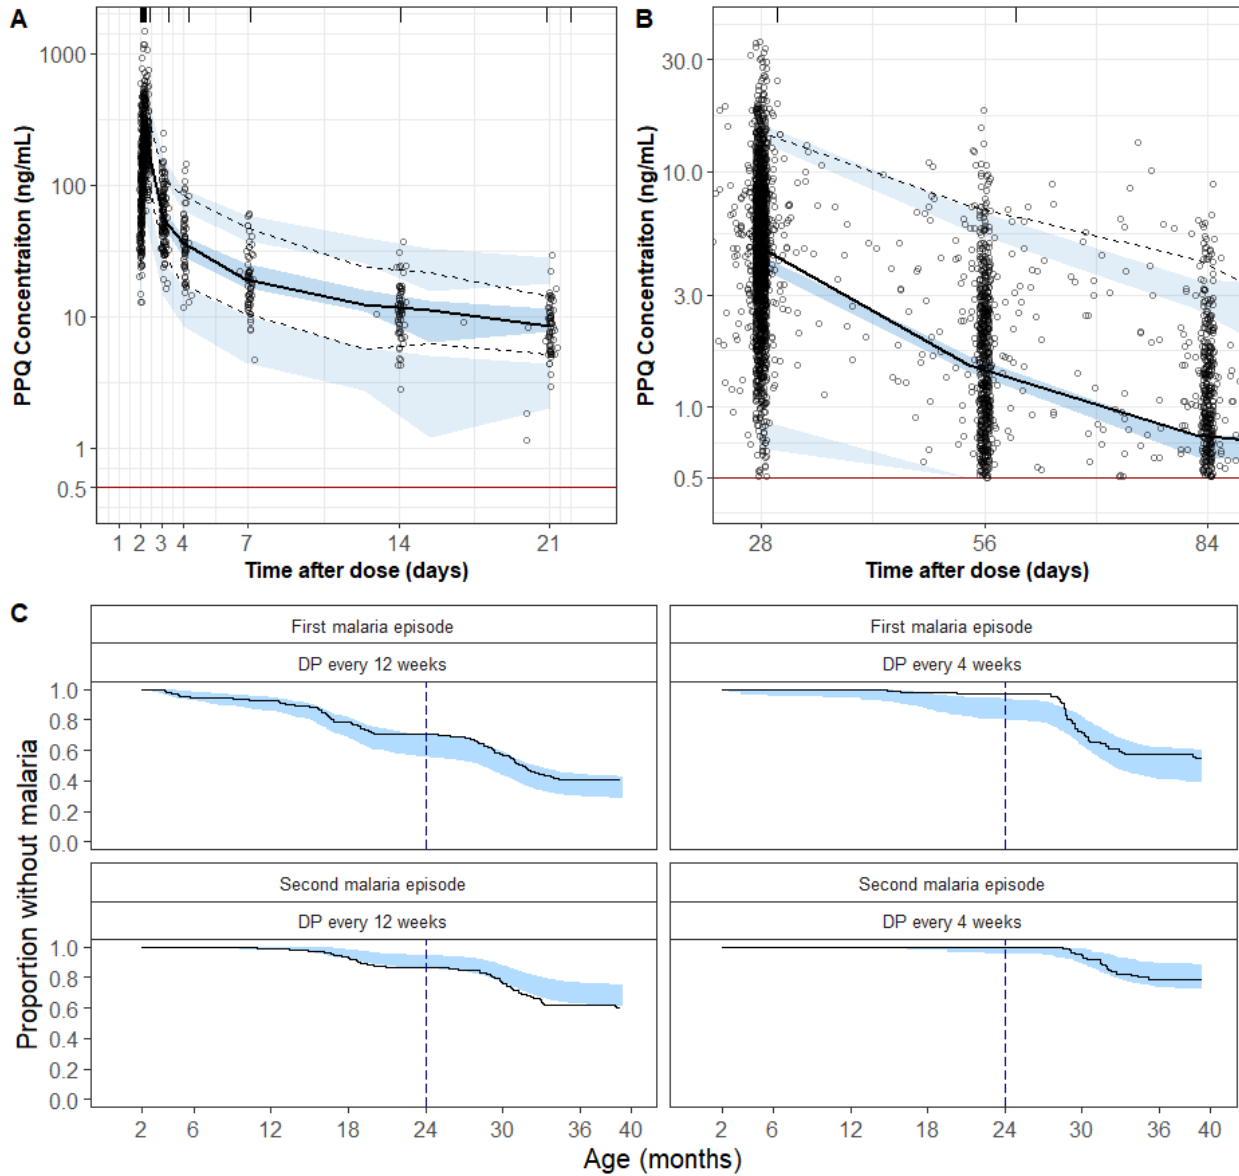

18

19 **Supplementary Figure 1.** Visual predictive check (VPC) of final

20 pharmacokinetic/pharmacodynamic (PK/PD) model. (A) VPC of intensive piperazine (PPQ)

21 data through 21 days after dose, with sampling beginning after the last daily dose (day 2) and (B)

22 VPC of sparse PPQ data collected 28, 56, and 84 days after DP. Points are observed PPQ

23 concentrations, solid line indicates median of observed data, and dashed lines indicate the 5%

24 and 95% confidence intervals of observed data. Shaded areas indicate 5%, 50% and 95% of  
25 simulated data from the final PPQ PK model. Red line at 0.5 ng/mL indicates the lower limit of  
26 quantification for the PPQ assay. (C) VPC for PK/PD repeated time to event model for incident  
27 malaria. Solid line indicates time from start of the study to labeled malaria episode, shaded areas  
28 describes 95% of the simulated data.

29

30

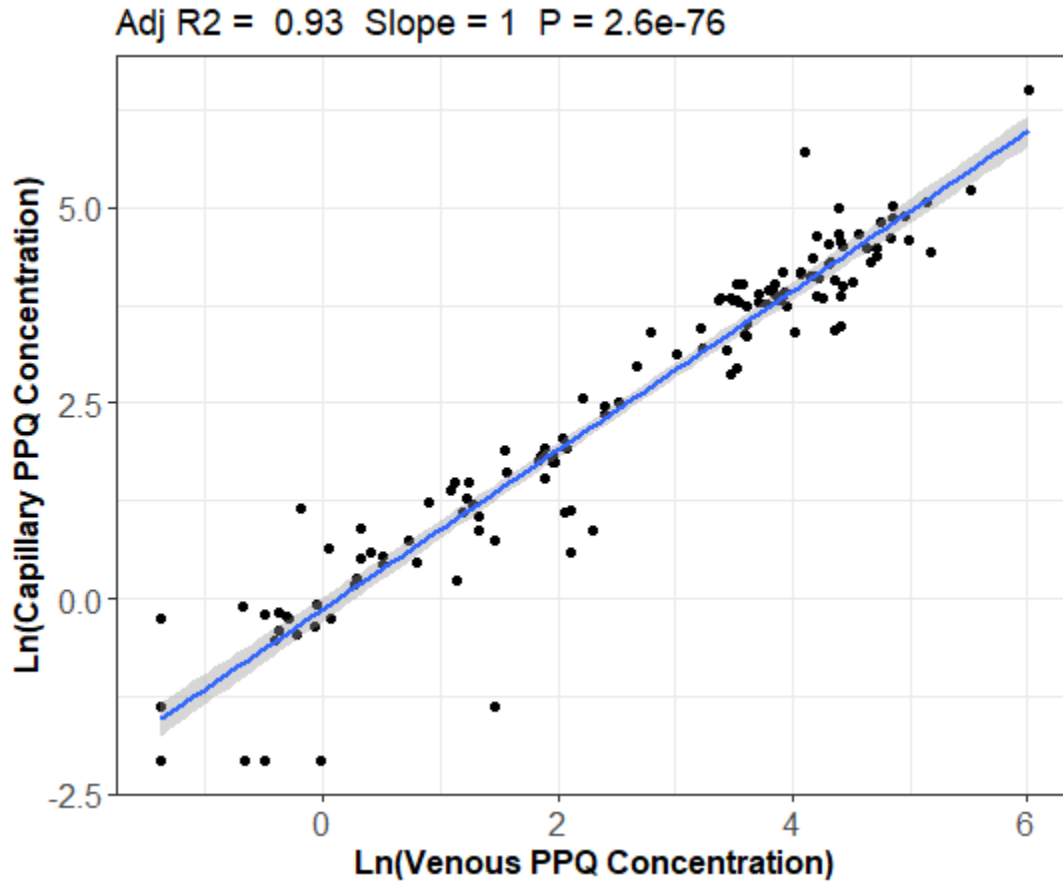

31

32 **Supplementary Figure 2.** Venous and capillary PPQ concentration correlation. The slope and  
33 statistical significance were determined by linear regression. The regression line is in blue, with  
34 the 95% confidence interval of the estimate shaded in grey. Paired samples were available from  
35 70 children who participated in the study.

36

37

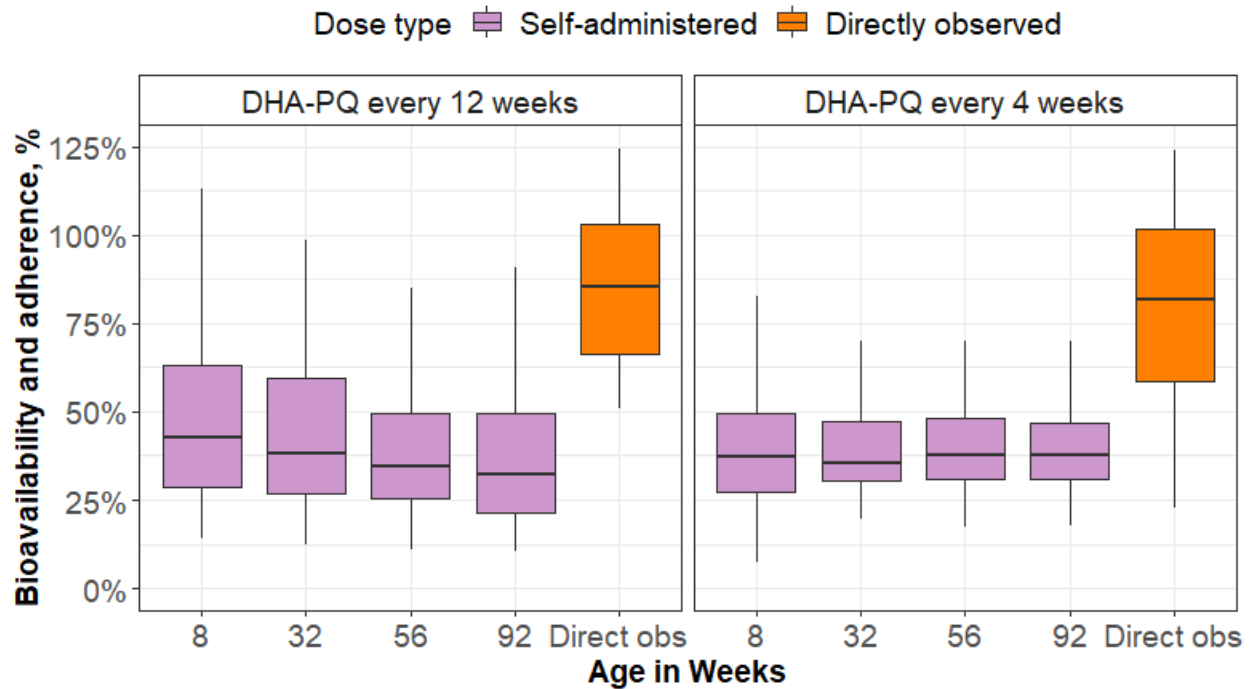

38

39 **Supplementary Figure 3.** Comparison of estimated bioavailability of piperavaquine (PPQ)  
 40 between directly observed and non-directly observed (self-administered) treatment courses.  
 41 When the first of three dihydroartemisinin-piperavaquine (DP) doses was directly observed (self-  
 42 administered), the boxplots are shaded in purple and when all three doses were directly observed  
 43 the boxplot is shaded orange. Boxes indicate PPQ relative bioavailability for 25% (minima),  
 44 50% (center) and 75% (maxima) of the population, and vertical bars represent relative  
 45 bioavailability levels for 95% of the population. Data are from 184 children in the DP every 12  
 46 week arm and 96 children in the DP ever 4 week arm.

47

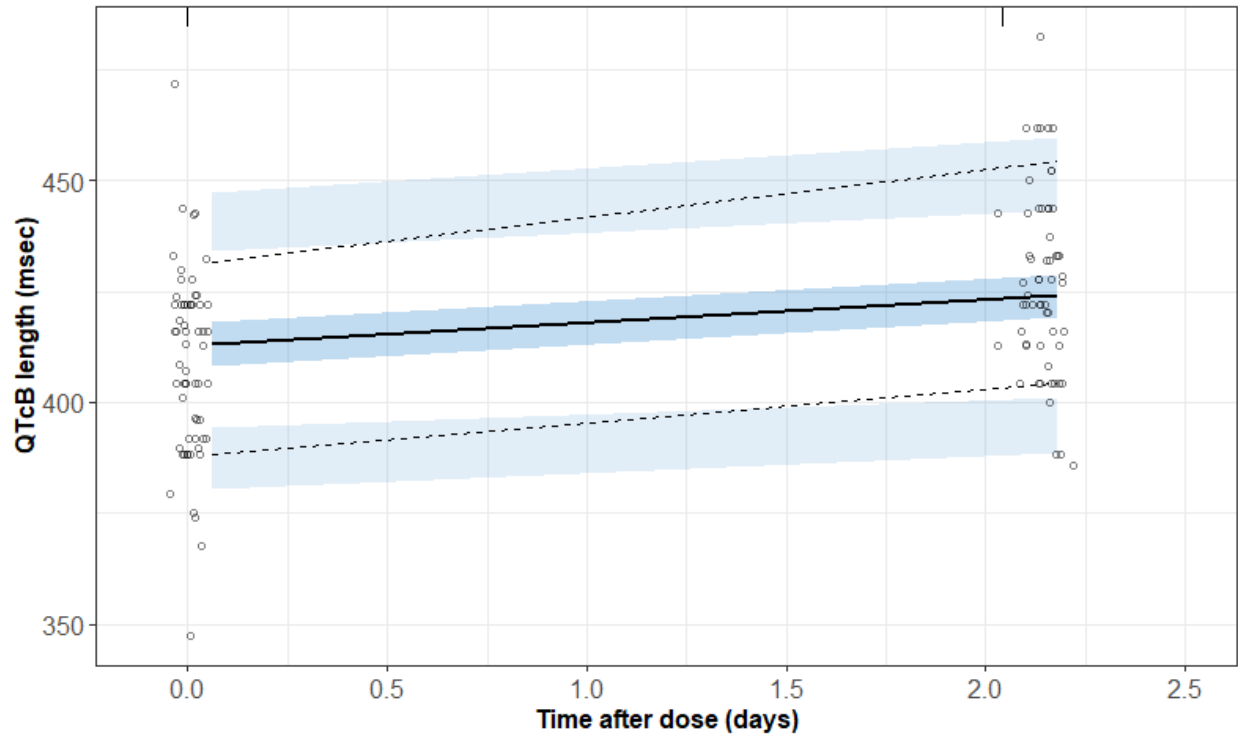

48

49 **Supplementary Figure 4.** Visual predictive check for the pharmacokinetic-corrected QT  
50 interval by Bazett's formula (PK-QTcB) model. Dots indicate observed data, and lines indicate  
51 median, 10% and 90% of the population. Shaded areas indicate the 10%, 50%, and 90% ranges  
52 of the simulated data. Data are from the 32 participants from the intensive pharmacokinetic  
53 substudy.

54

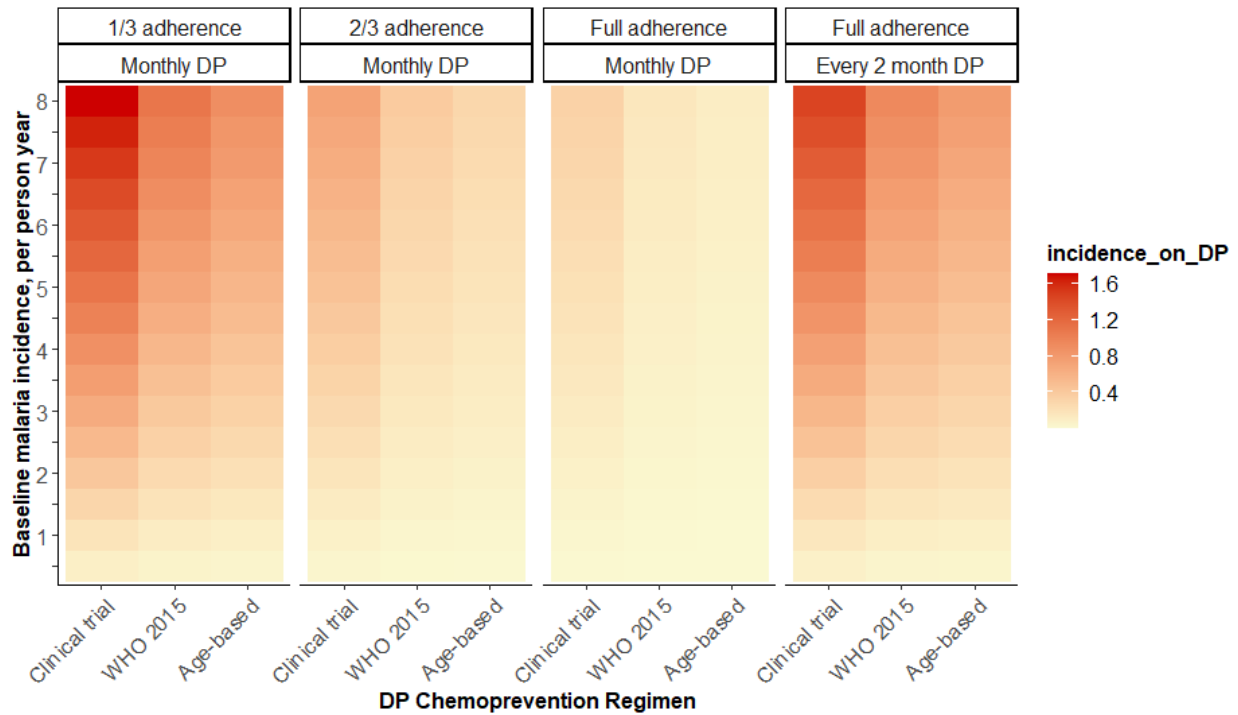

56

57 **Supplementary Figure 5.** Predicted impact of adherence and dihydroartemisinin-piperaquine  
 58 (DP) regimen on malaria incidence with different chemoprevention regimens, including by dose  
 59 and frequency. 1/3 adherence indicates bioavailability observed for non-directly observed  
 60 therapy in the study, 2/3 adherence indicates a bioavailability midpoint between the directly and  
 61 non-directly observed population, and full adherence indicates the bioavailability observed in the  
 62 directly observed therapy group. Simulations were conducted using the 10,000 simulations of the  
 63 280 children from the study population and incidence calculated between 2 and 24 months of  
 64 age. Age-based dosing indicates daily piperaquine doses as follows (<6 months = 160 mg; 6-<18  
 65 months = 240 mg; 18-26 months = 320 mg).

66

67



68

69

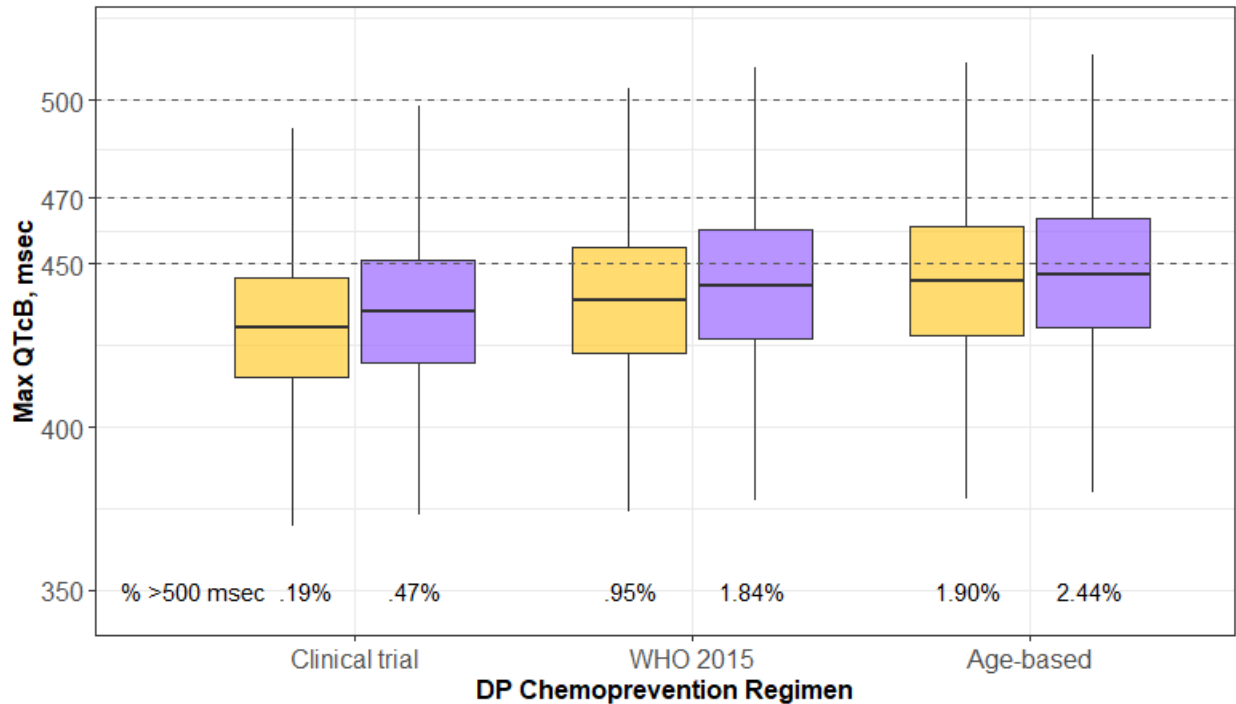

70

71 **Supplementary Figure 6.** Predicted maximum corrected QT interval using Bazett's formula  
72 (QTcB prolongation) by dihydroartemisinin-piperazine (DP) regimen. Maximum piperazine  
73 (PPQ) concentrations predicted with the currently approved WHO 2015 regimens and the  
74 proposed age-based dosing regimens were higher than the maximum PPQ concentrations used to  
75 develop the PK-QTc model. The gold boxes indicate a malnourished population at the start of  
76 chemoprevention with  $WAZ \leq -2$  and purple indicates a better nourished population with  $WAZ > -2$   
77 at the start of chemoprevention. The boxes indicate the QTcB for 25% (minima), 50% (center)  
78 and 75% (maxima) of the population, and vertical bars represent the QTcB for 95% of the  
79 population. Data are from 10,000 simulations of demographic information from 280 children.
